# Supplementary material for: An aza-Diels–Alder route to quinoline-based unnatural amino acids and polypeptide surrogates
Source: Royal Society of Chemistry journal article supplement (doi:10.1039/d0ra04783j), 2021-01-01
Supplement: d0ra04783j1.pdf [file d0ra04783j1.pdf]

**An aza-Diels–Alder route to quinoline-based unnatural amino acids and polypeptide  
surrogates**

M. J. Umerani<sup>1</sup>, H. Yang<sup>2</sup>, P. Pratakshya<sup>2</sup>, J. S. Nowick<sup>2</sup>, A. A. Gorodetsky<sup>1,2,3,\*</sup>

<sup>1</sup>Department of Materials Science and Engineering, University of California, Irvine, Irvine, CA  
92697, USA

<sup>2</sup>Department of Chemistry, University of California, Irvine, Irvine, CA 92697, USA

<sup>3</sup>Department of Chemical and Biomolecular Engineering, University of California, Irvine, Irvine,  
CA 92697, USA

\*Correspondence to: [alon.gorodetsky@uci.edu](mailto:alon.gorodetsky@uci.edu)

**Table of Contents:**

|            |                                           |            |
|------------|-------------------------------------------|------------|
| <b>I.</b>  | <b>General Information and Procedures</b> | <b>S-2</b> |
| <b>II.</b> | <b>Collated Characterization Data</b>     | <b>S-5</b> |

## **I. General Information and Procedures.**

**A. Materials.** All chemicals and reagents were purchased from Acros Organics, ChemPep, and/or Sigma-Aldrich, and all solvents were obtained from Fisher Scientific and used as received, unless otherwise noted. The dimethylformamide used to prepare the quinoline-based amino acids and polypeptide surrogates was dried with 3 Å molecular sieves and stored under argon. The reactions were performed under dry argon unless otherwise noted.

**B. Purification of the Quinoline-based Amino Acids and Polypeptide Surrogates.** The quinoline-based amino acid and polypeptide surrogates were purified via flash chromatography by using a Teledyne Isco CombiFlash Rf 200 System. When necessary, the silica gel columns/cartridges were flushed with 1/9 triethylamine/chloroform to deactivate the silica gel and were then flushed with chloroform to remove excess triethylamine.

**C. Spectroscopic Characterization of the Quinoline-based Amino Acid and Polypeptide Surrogates.** The quinoline-based amino acids and polypeptide surrogates, as well as the intermediates necessary for their synthesis, were characterized with nuclear magnetic resonance (NMR) spectroscopy, matrix-assisted laser desorption/ionization (MALDI) mass spectrometry, ultraviolet-visible (UV-Vis) absorption spectroscopy, fluorescence spectroscopy, and/or circular dichroism (CD) spectroscopy. The  $^1\text{H}$  NMR and  $^{13}\text{C}$  NMR spectra were typically recorded on an AVANCE600 instrument in  $\text{CDCl}_3$ ,  $\text{DMF-d}_7$ , and/or  $\text{DMSO-d}_6$ . The chemical shifts were reported in ppm for  $^1\text{H}$  and  $^{13}\text{C}$  NMR. The chemical shifts in the NMR spectra were referenced as follows: for samples in  $\text{CDCl}_3$ , the  $^1\text{H}$  NMR signals were referenced to  $\text{CDCl}_3$  at 7.26 ppm, and the  $^{13}\text{C}$  NMR signals were referenced to  $\text{CDCl}_3$  at 77.16 ppm; for samples in  $\text{DMF-d}_7$ , the  $^1\text{H}$  NMR signals were referenced to the solvent peak at 8.03 ppm, and the  $^{13}\text{C}$  NMR signals were referenced to the solvent peak at 163.15 ppm; for samples in  $\text{DMSO-d}_6$ , the  $^1\text{H}$  NMR signals were referenced to the

solvent peak at 2.50 ppm, and the  $^{13}\text{C}$  NMR signals were referenced to the solvent peak at 39.51 ppm. The data are labeled as follows: chemical shift, multiplicity (s = singlet, d = doublet, t = triplet, q = quartet, quint = quintet, m = multiplet), the coupling constants in Hertz, and the integration value. The MALDI mass spectra were recorded on an AB Sciex TOF/TOF 5800 series mass spectrometer using a 349 nm Nd:YAG laser and either dithranol or 2,5-dihydroxybenzoic acid (DHB) as the matrix. The UV-Vis absorption spectra were collected on an Agilent Cary 100 Series UV-Vis absorption spectrophotometer in tetrahydrofuran (THF) at room temperature. The fluorescence spectra were collected on a Cary Eclipse fluorescence spectrophotometer in tetrahydrofuran (THF) at room temperature. The CD spectra were collected on a JASCO J-810 spectropolarimeter in tetrahydrofuran (THF) at room temperature.

**D. Chromatographic Characterization and Analysis of the Quinoline-based Amino Acids and Polypeptide Surrogates.** The quinoline-based amino acids and polypeptide surrogates were characterized via high-performance liquid chromatography (HPLC) or via size-exclusion chromatography (SEC). The HPLC experiments were performed on an Agilent 1260 Infinity System using a reverse phase C18 column. The gradient was evolved from 95% Buffer A:5% Buffer B to 5% Buffer A:95% Buffer B at a flow rate of 1 mL/min over 35 min (Buffer A: 99.9% water, 0.1% trifluoroacetic acid; Buffer B: 95% acetonitrile, 4.9% water, 0.1% trifluoroacetic acid). The typical flow rate was 1 mL/min, typical injection volume was 50 – 100  $\mu\text{L}$ , and typical sample concentration was 1 mg/mL. The SEC experiments were performed on a Malvern OMNISEC GPC/SEC system comprised of the OMNISEC RESOLVE separations module that is equipped with a Malvern single-pore T3000 column (300 x 8 mm), and the OMNISEC REVEAL multi-detector module that is equipped with a differential refractive index detector, multi-angle light scattering detector, viscometer, and UV/Vis spectrometer. Tetrahydrofuran (THF) was used

as the mobile phase. The typical flow rate was 0.8 mL/min, typical injection volume was 70 – 100  $\mu$ L, and typical sample concentration was 1.0 – 2.5 mg/mL. The molecular weights ( $M_n$  and  $M_w$ ) were estimated with the Omnisec V10 software using polystyrene (PS-245K) standards (Malvern).

## II. Collated Characterization Data

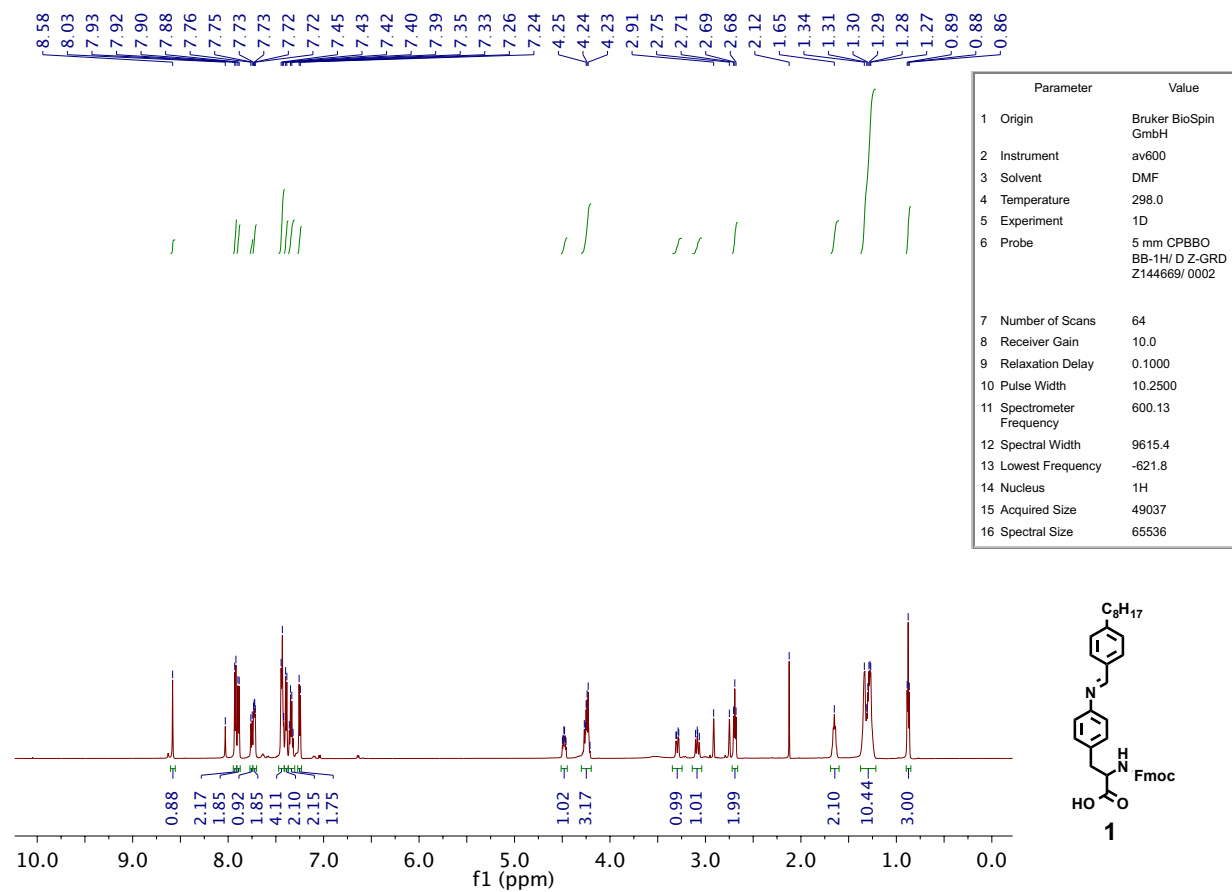

Figure S1. A  $^1\text{H}$  NMR spectrum obtained for **1**.

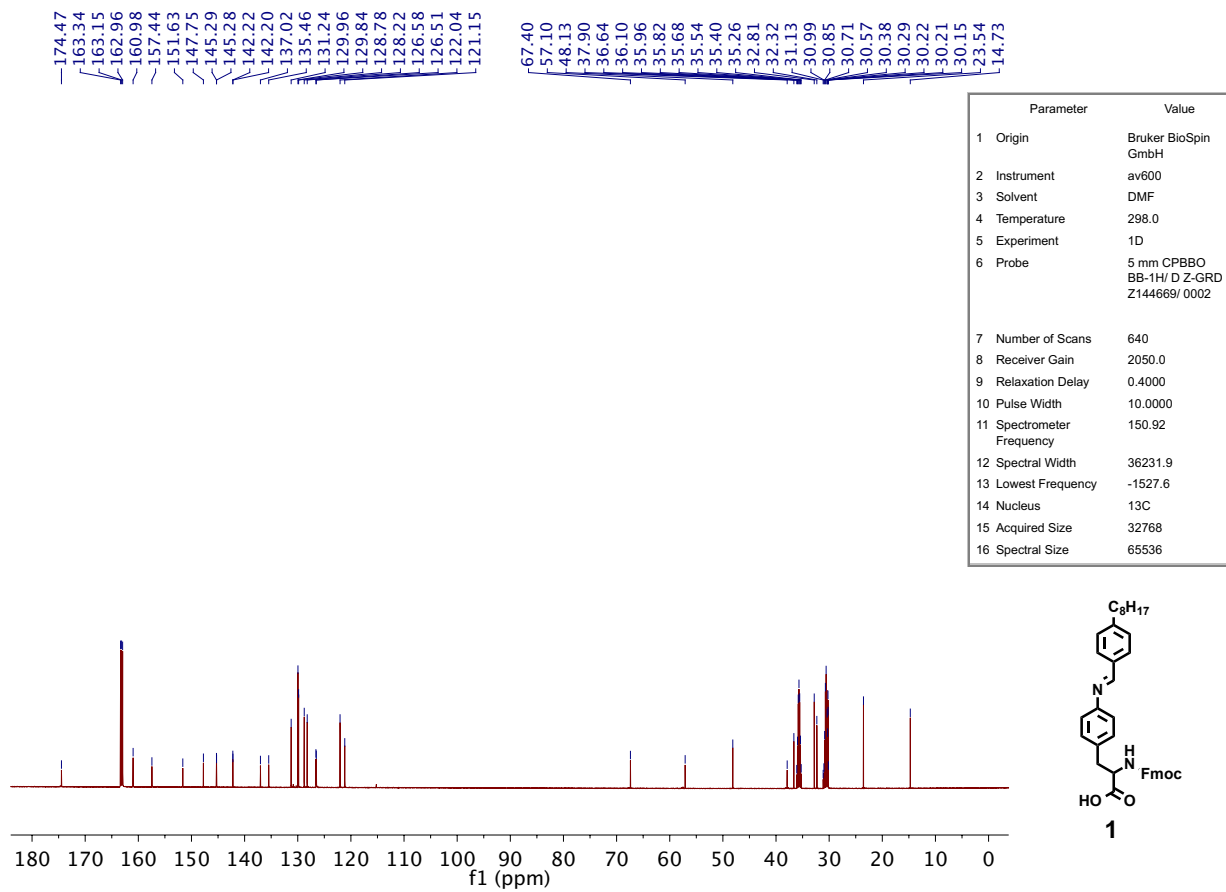

**Figure S2.** A  $^{13}\text{C}$  NMR spectrum obtained for **1**.

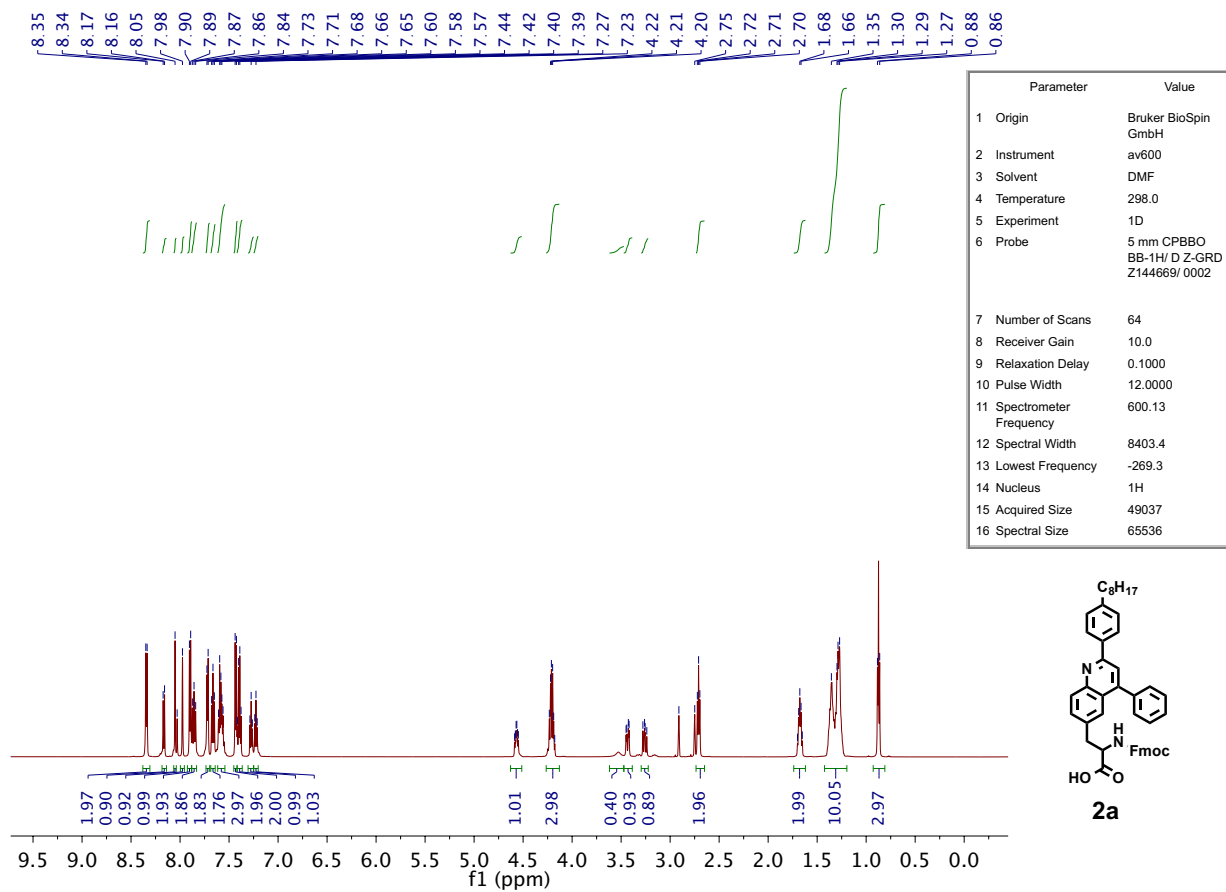

**Figure S3.** A  $^1\text{H}$  NMR spectrum obtained for **2a**.

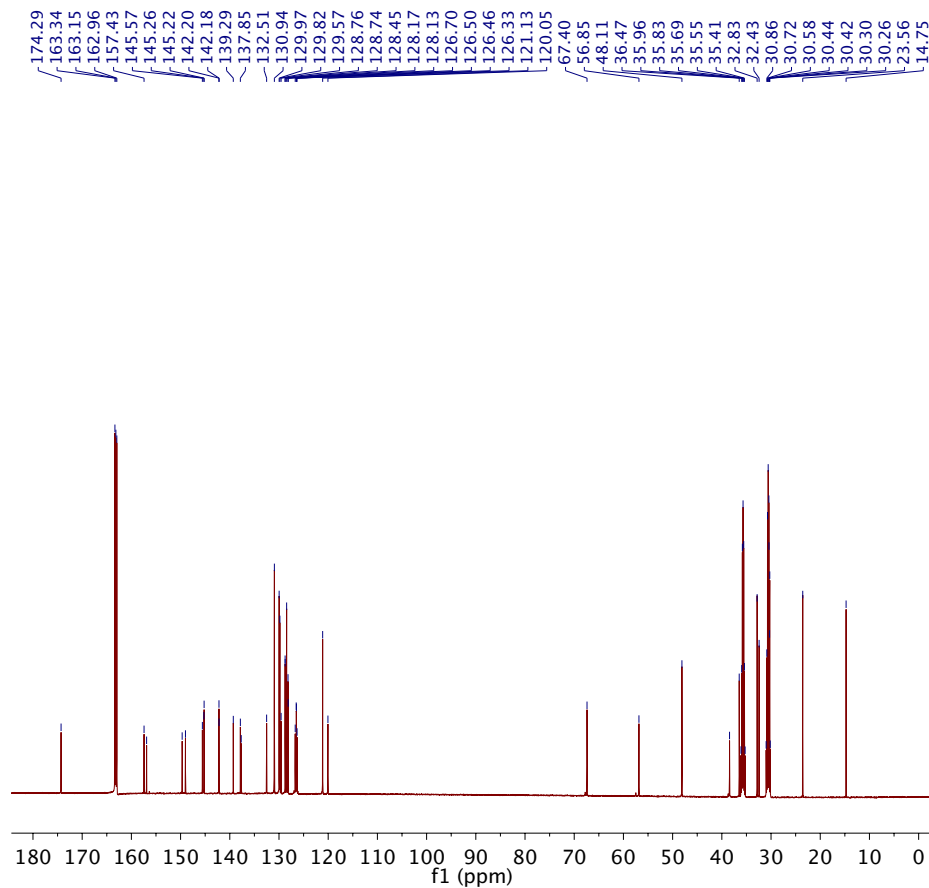

| Parameter                 | Value                                         |
|---------------------------|-----------------------------------------------|
| 1 Origin                  | Bruker BioSpin GmbH                           |
| 2 Instrument              | av600                                         |
| 3 Solvent                 | DMF                                           |
| 4 Temperature             | 298.0                                         |
| 5 Experiment              | 1D                                            |
| 6 Probe                   | 5 mm CPBBO<br>BB-1H/ D Z-GRD<br>Z144669/ 0002 |
| 7 Number of Scans         | 512                                           |
| 8 Receiver Gain           | 2050.0                                        |
| 9 Relaxation Delay        | 0.4000                                        |
| 10 Pulse Width            | 10.0000                                       |
| 11 Spectrometer Frequency | 150.92                                        |
| 12 Spectral Width         | 36231.9                                       |
| 13 Lowest Frequency       | -1508.9                                       |
| 14 Nucleus                | <sup>13</sup> C                               |
| 15 Acquired Size          | 32768                                         |
| 16 Spectral Size          | 65536                                         |

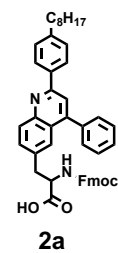

Figure S4. A <sup>13</sup>C NMR spectrum obtained for **2a**.



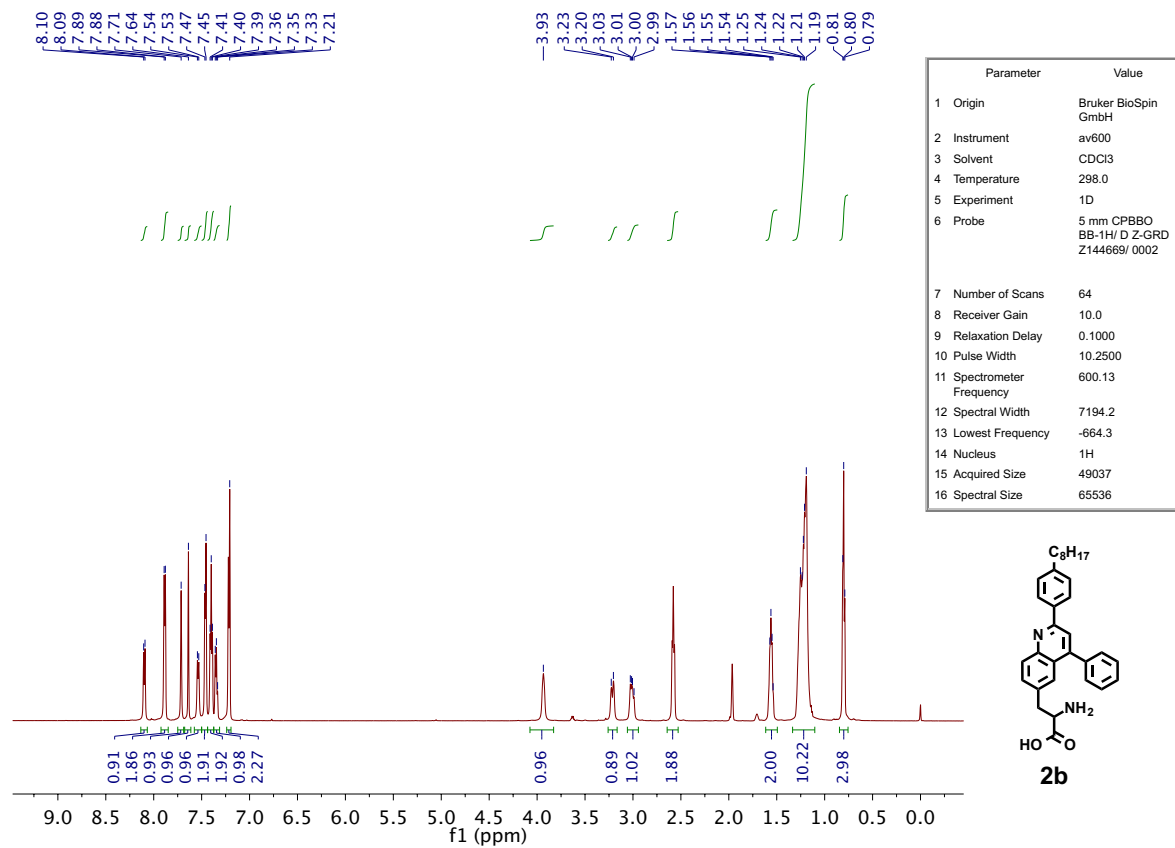

**Figure S5.** A  $^1\text{H}$  NMR spectrum obtained for **2b**.

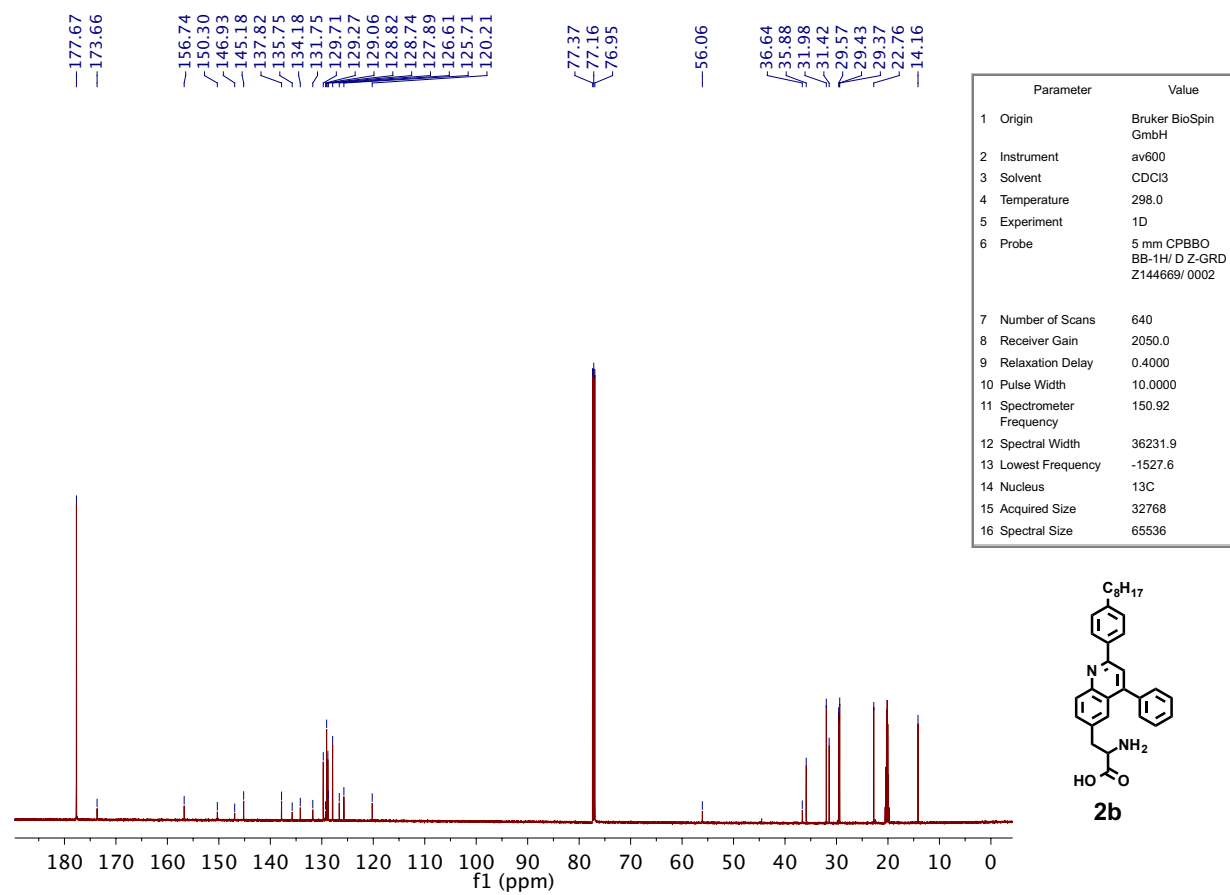

**Figure S6.** As  $^{13}\text{C}$  NMR spectrum obtained for **2b**

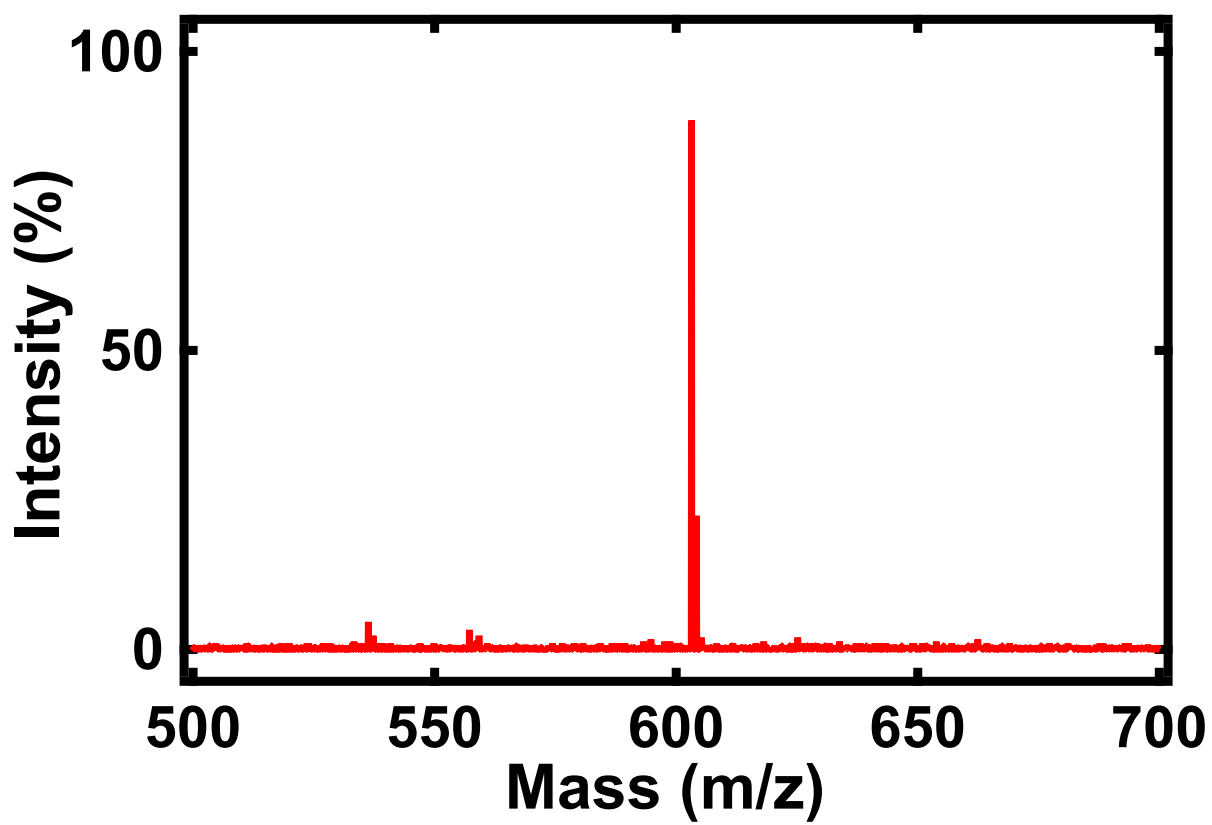

Figure S7. A MALDI mass spectrum obtained for 1.

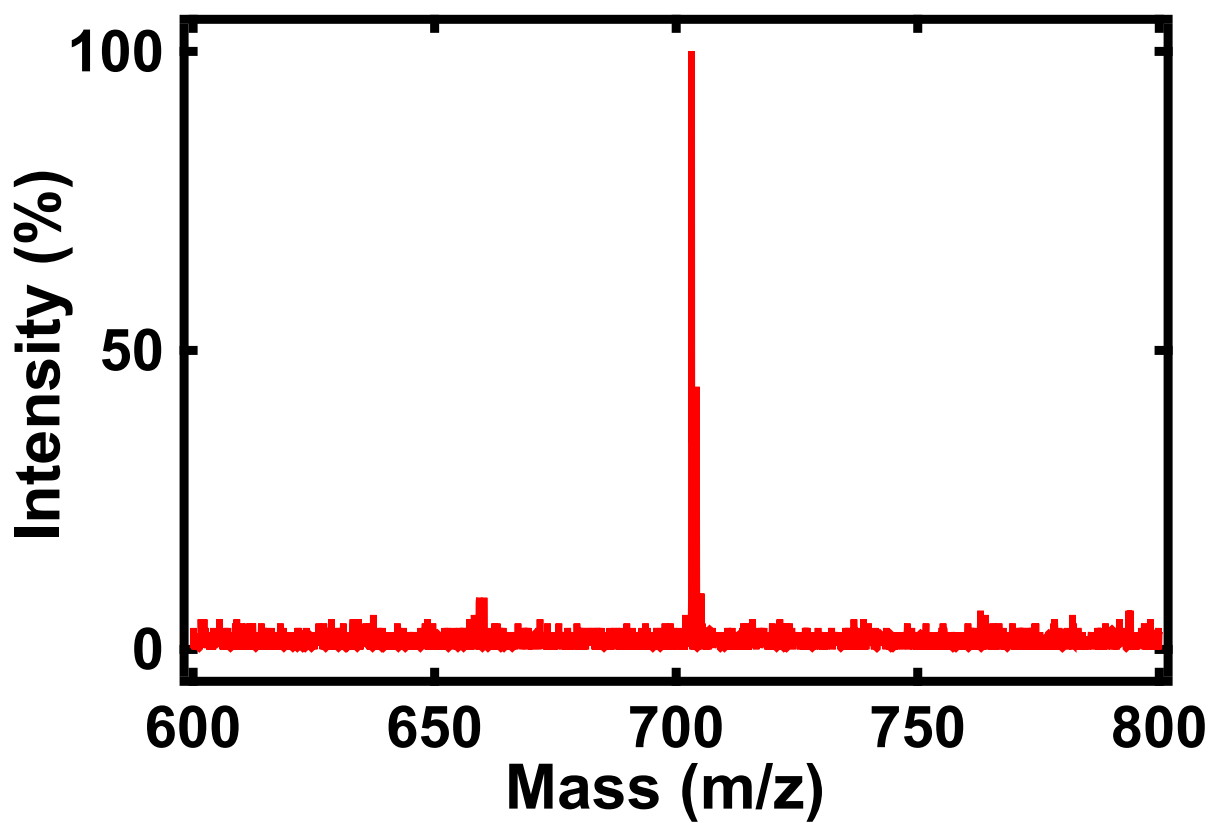

Figure S8. A MALDI mass spectrum obtained for 2a.

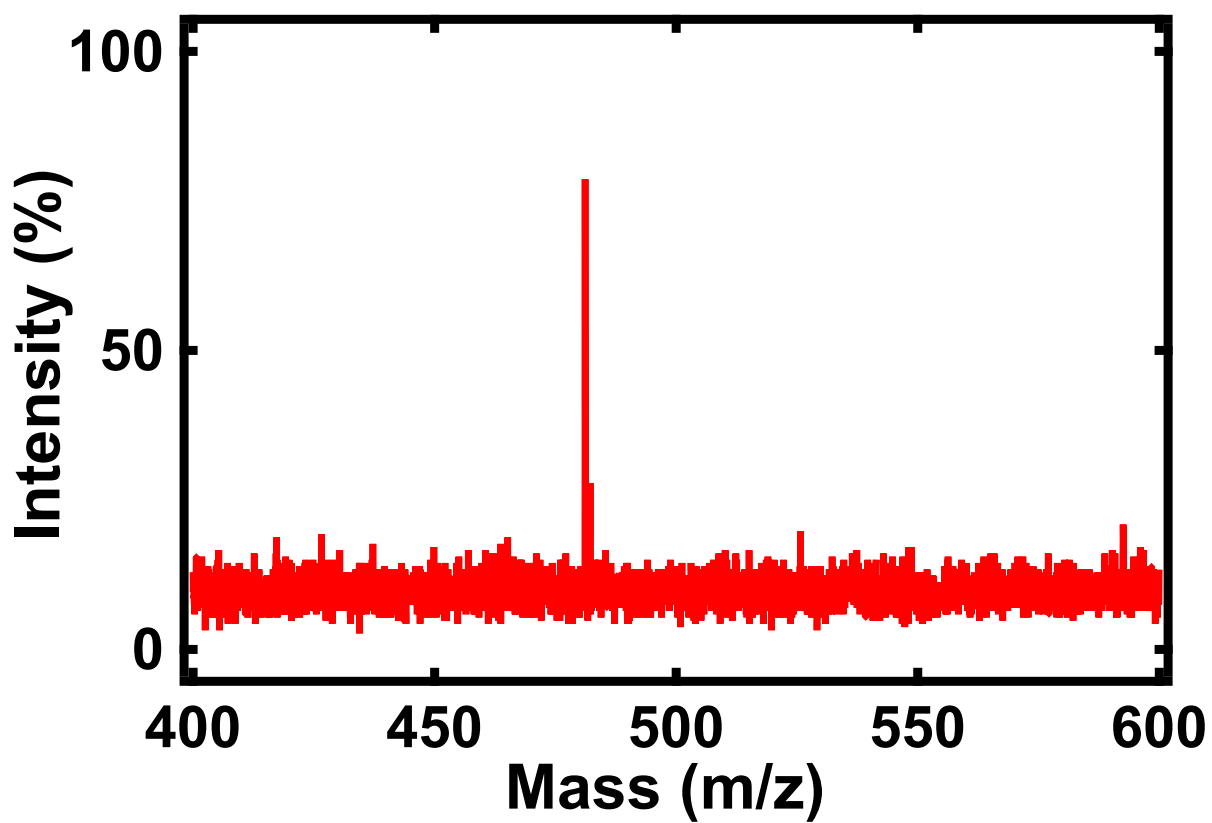

Figure S9. A MALDI mass spectrum obtained for 2b.

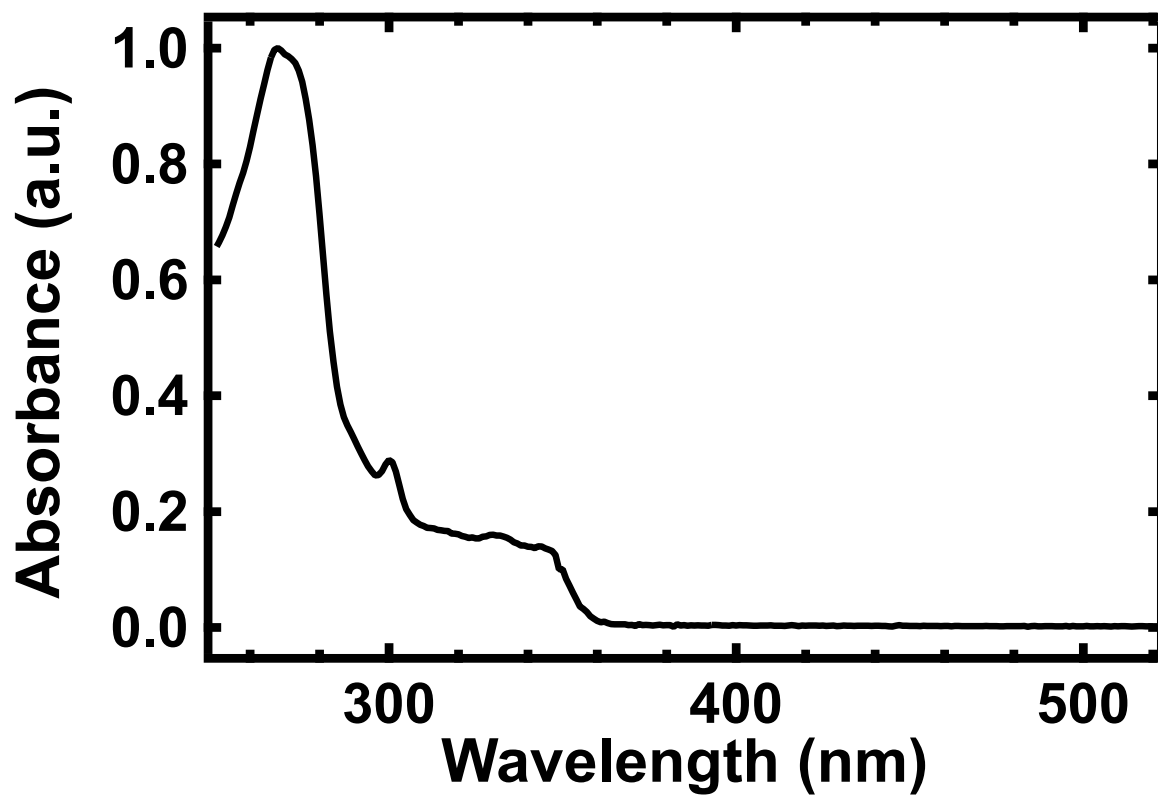

**Figure S10.** A UV-Vis absorption spectrum obtained for **2a**.

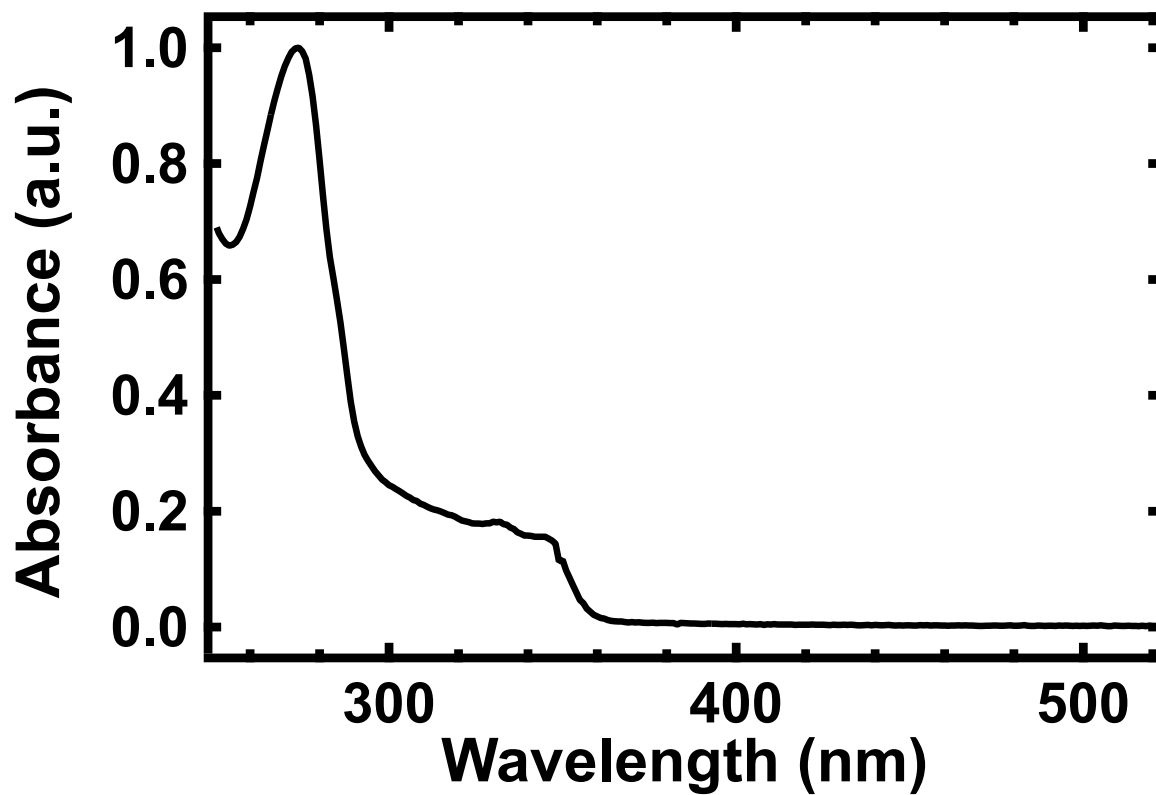

Figure S11. A UV-Vis absorption spectrum obtained for 2b.

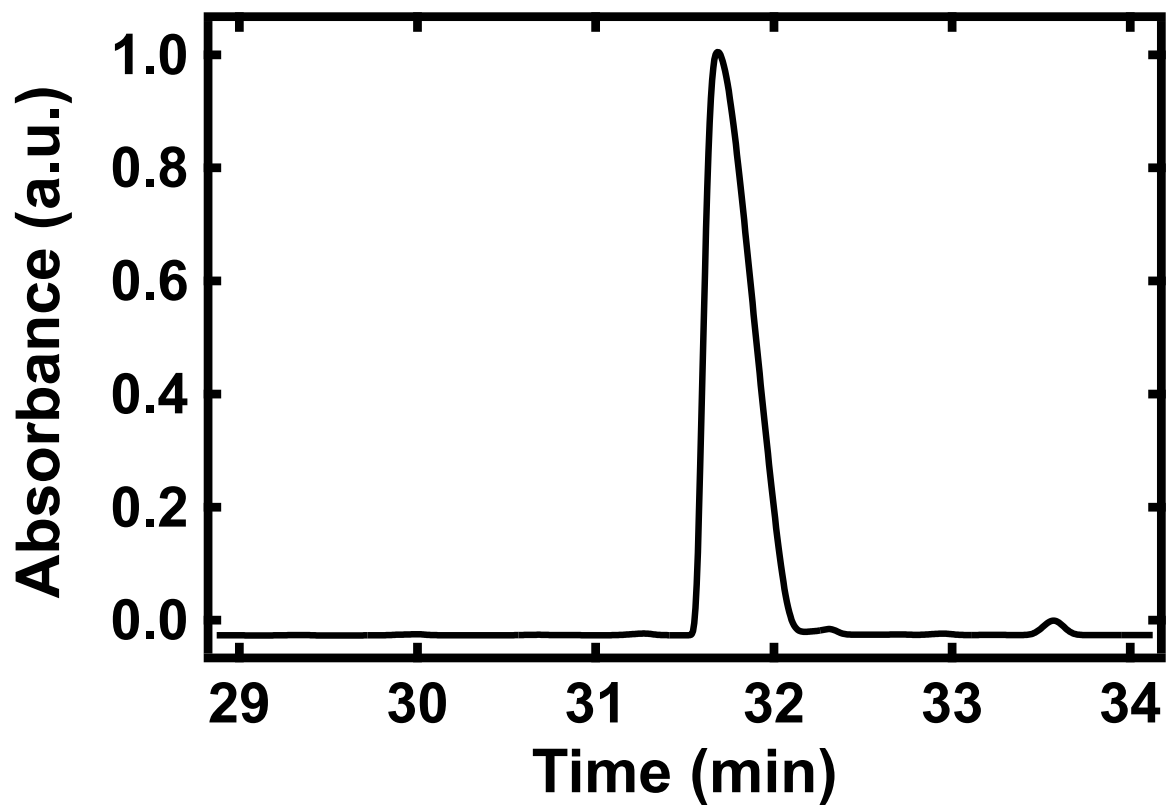

Figure S12. An HPLC chromatogram obtained for 2a.



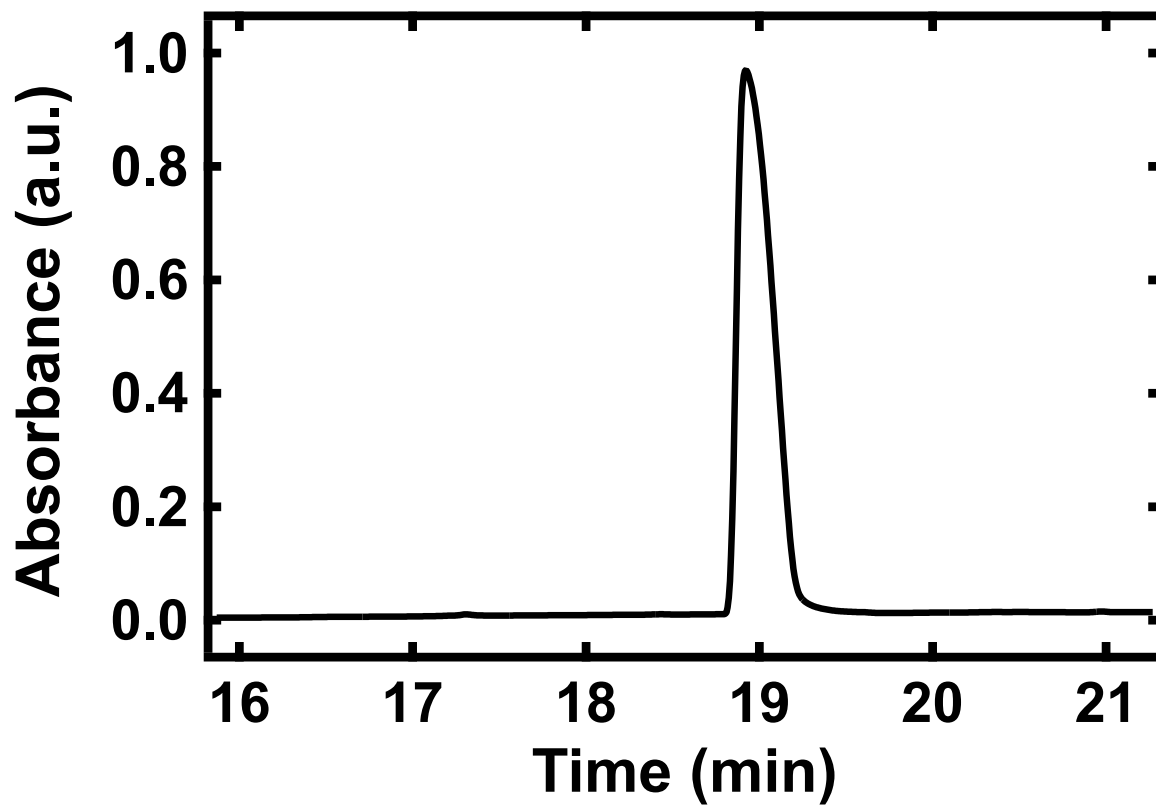

Figure S13. An HPLC chromatogram obtained for 2b.

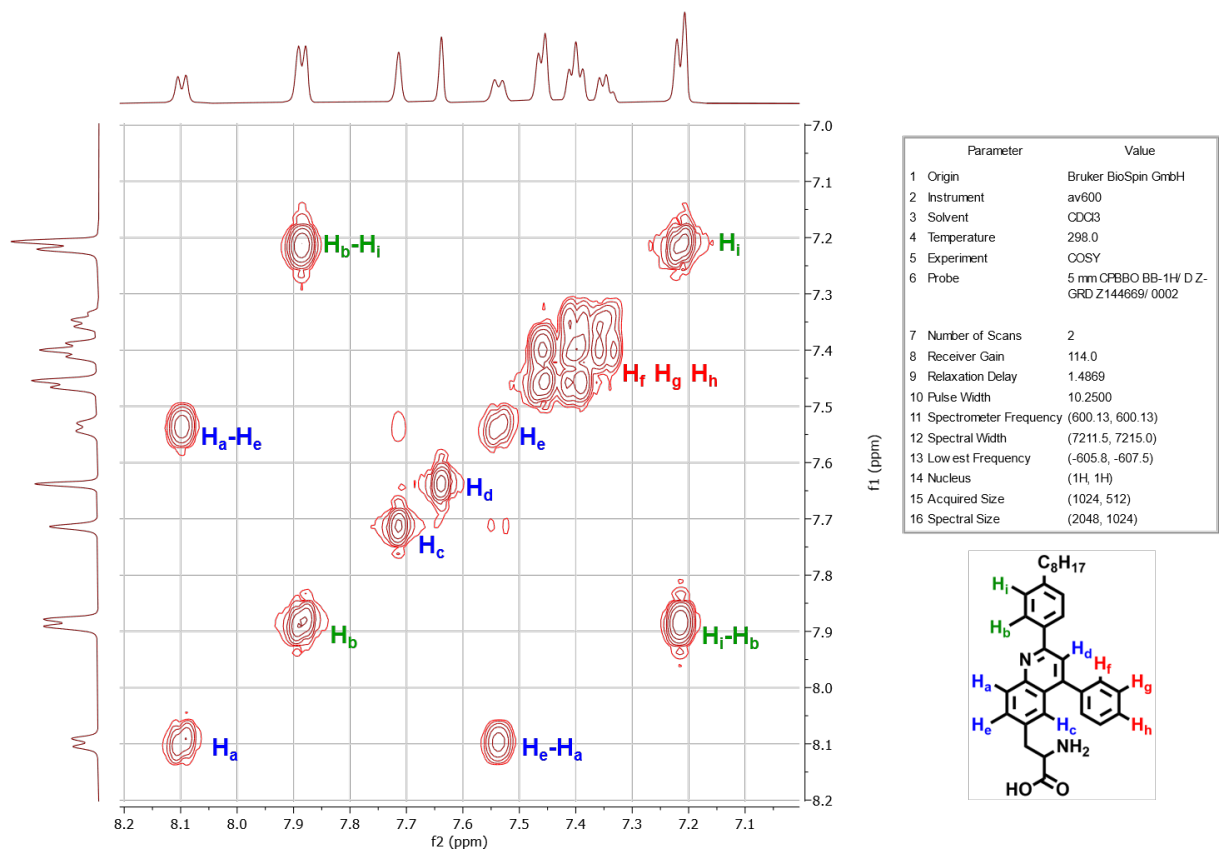

**Figure S14.** A  $^1\text{H}$ - $^1\text{H}$  COSY spectrum obtained for **2b**. The assignment of the aromatic protons is indicated.

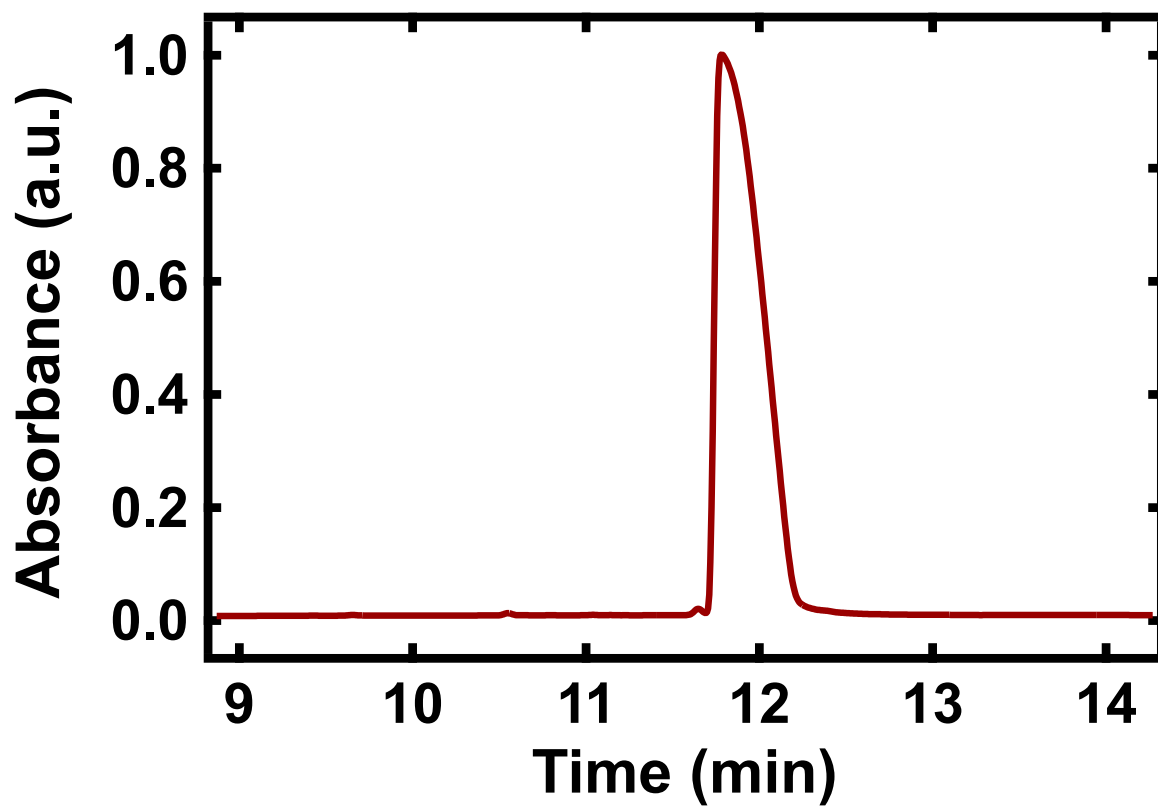

Figure S15. An HPLC chromatogram obtained for 3.

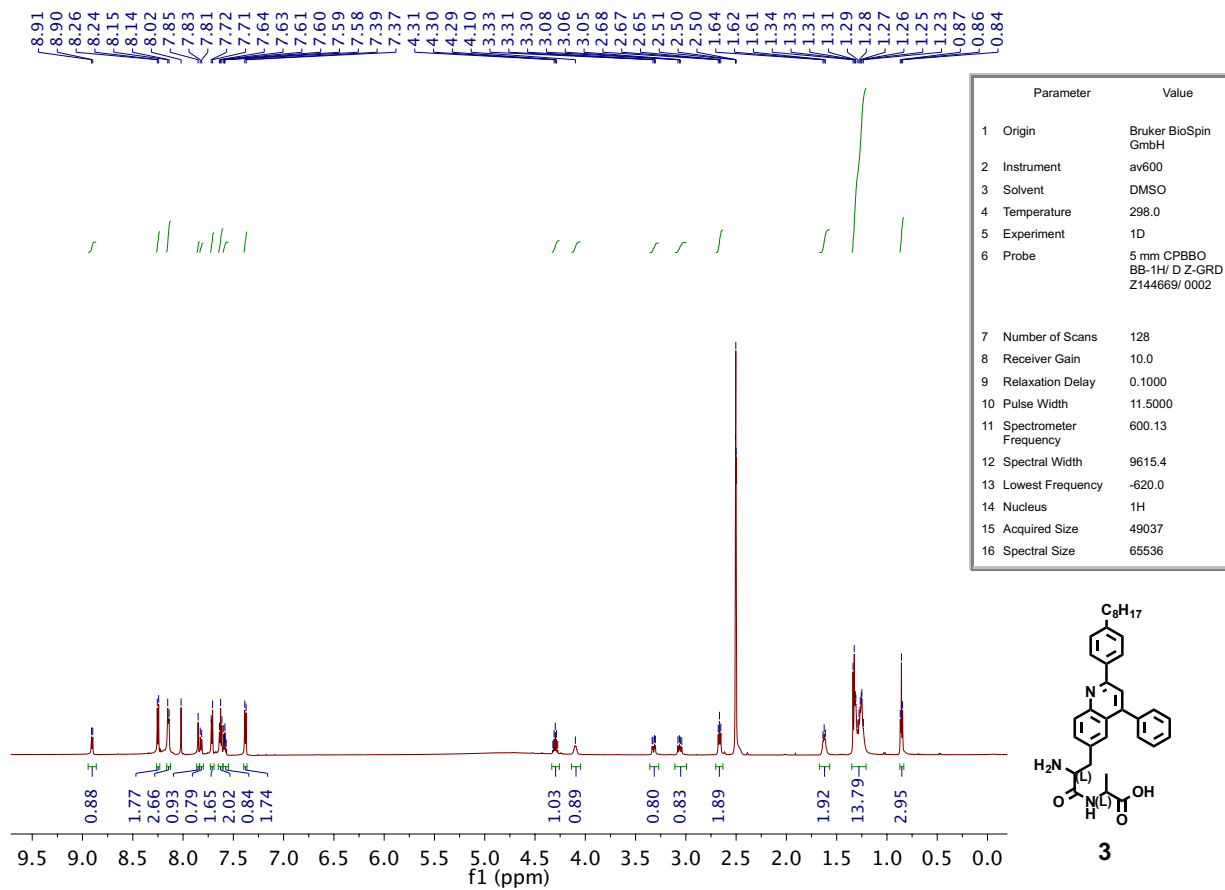

**Figure S16.** A <sup>1</sup>H NMR spectrum obtained for **3**.

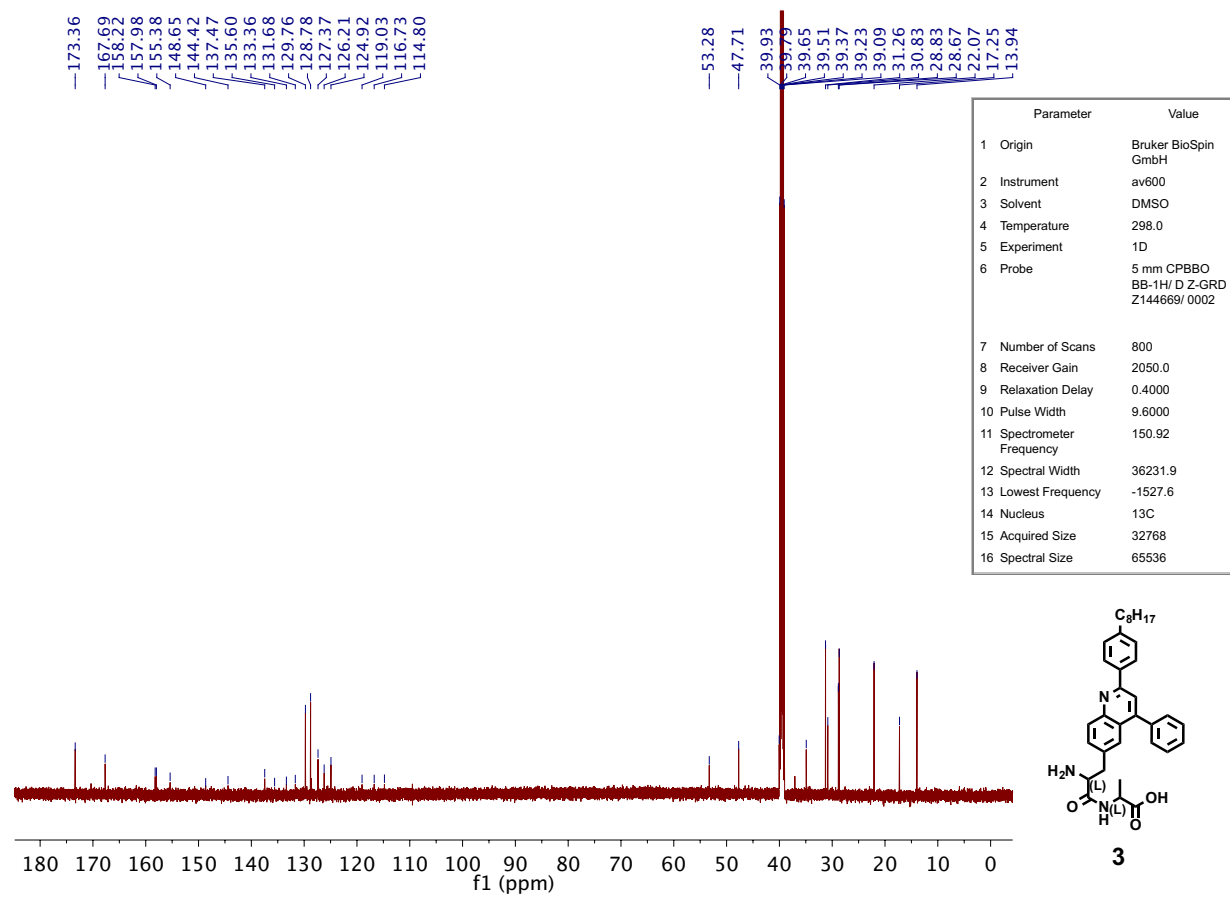

**Figure S17.** A  $^{13}C$  NMR spectrum obtained for **3**.

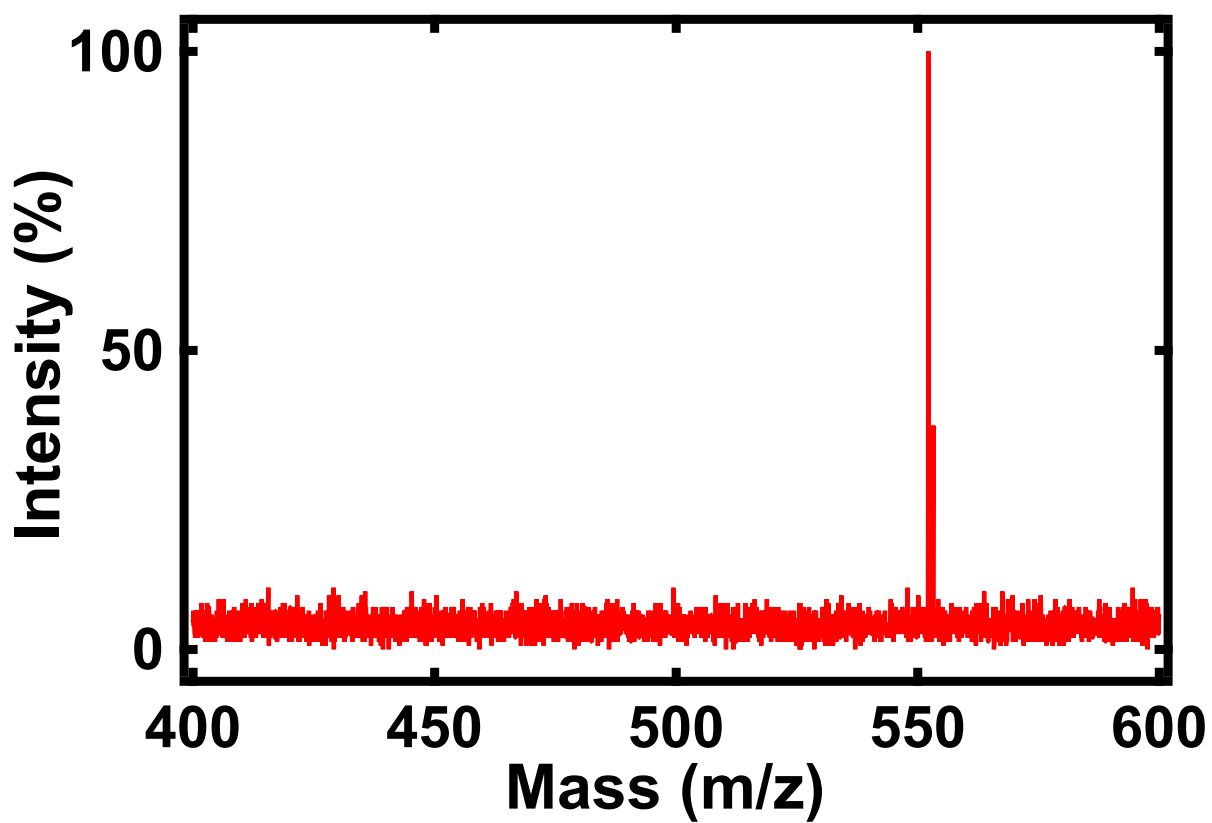

Figure S18. A MALDI mass spectrum obtained for 3.

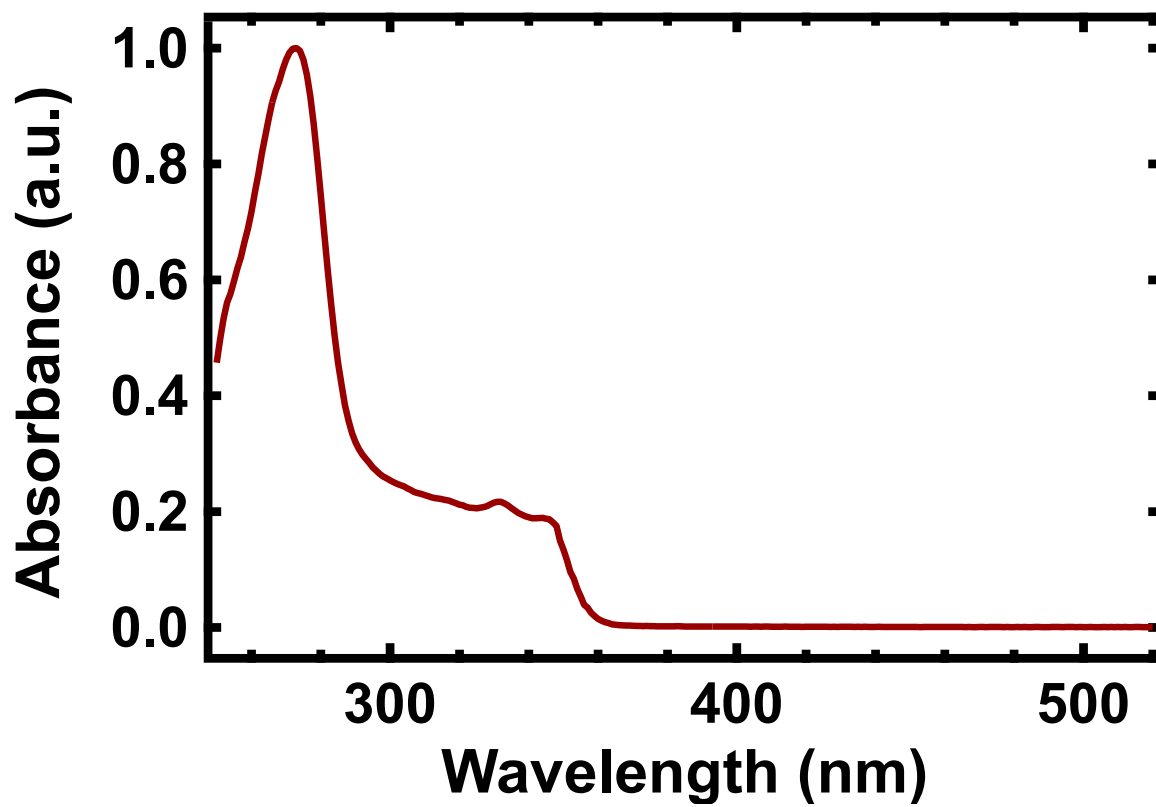

**Figure S19.** A UV-Vis absorption spectrum obtained for **3**.

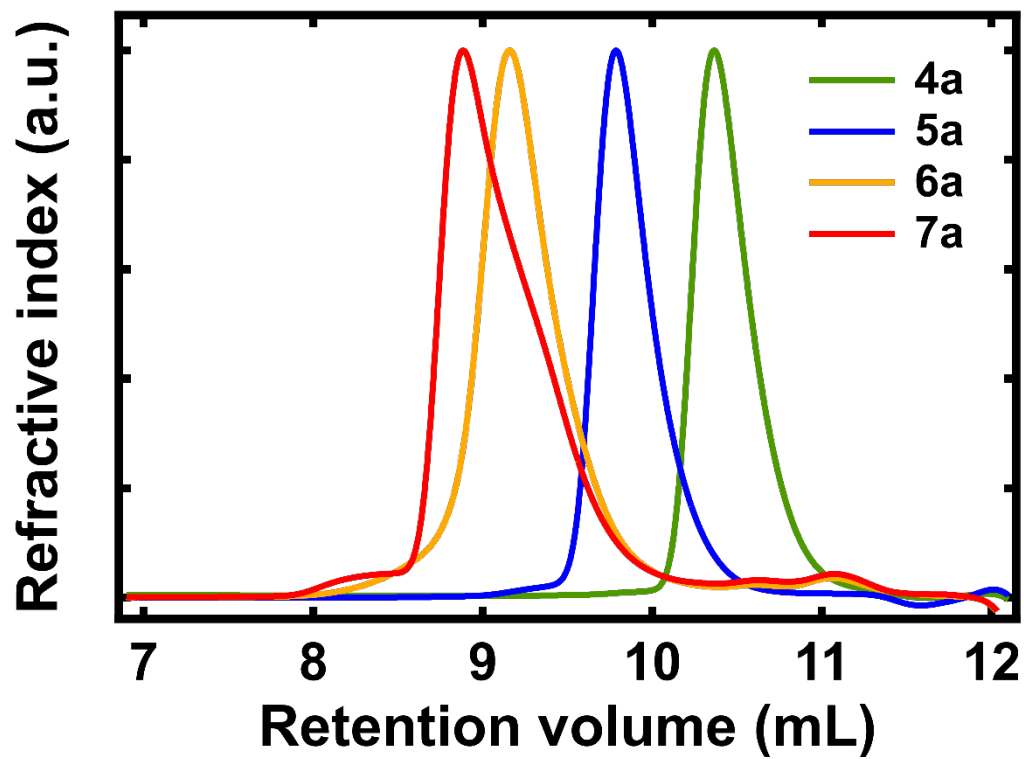

**Figure S20.** The SEC chromatograms obtained for **4a** (green trace), **5a** (blue trace), **6a** (orange trace), and **7a** (red trace).



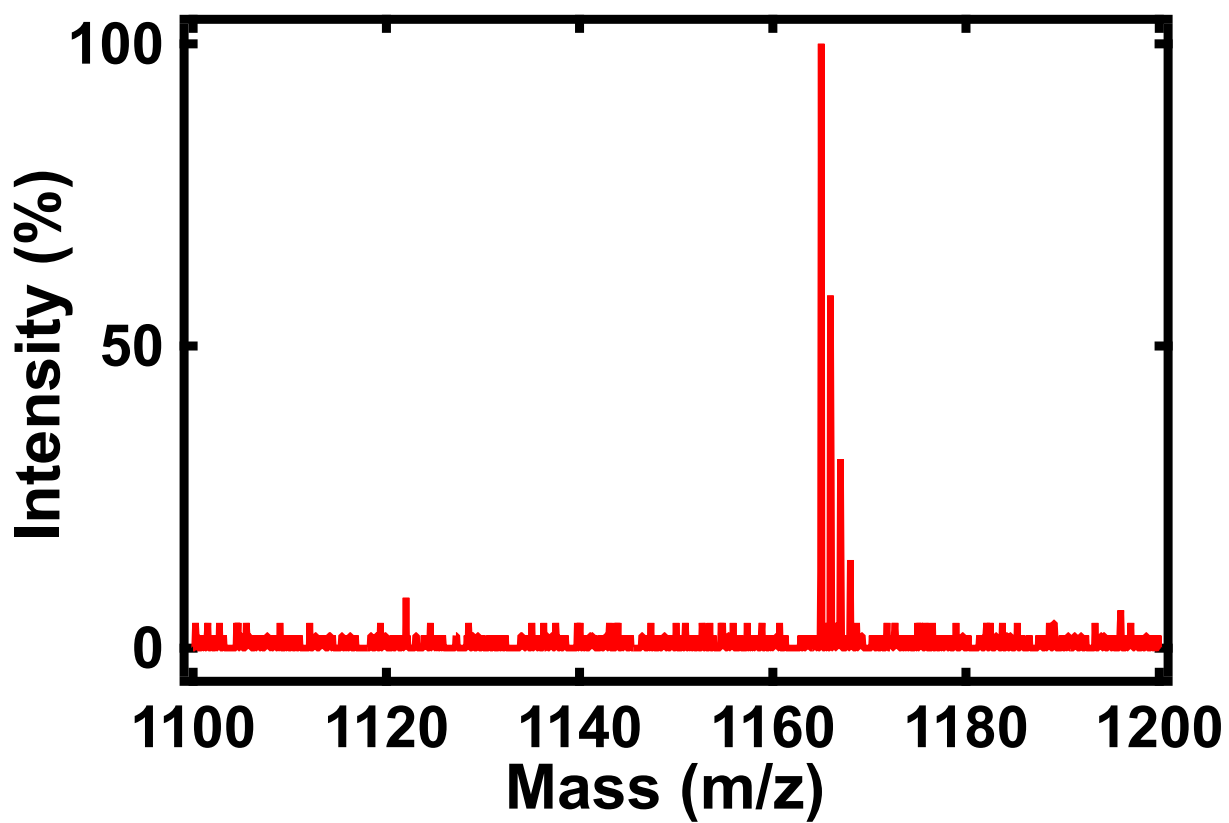

Figure S21. A MALDI mass spectrum obtained for 4a.

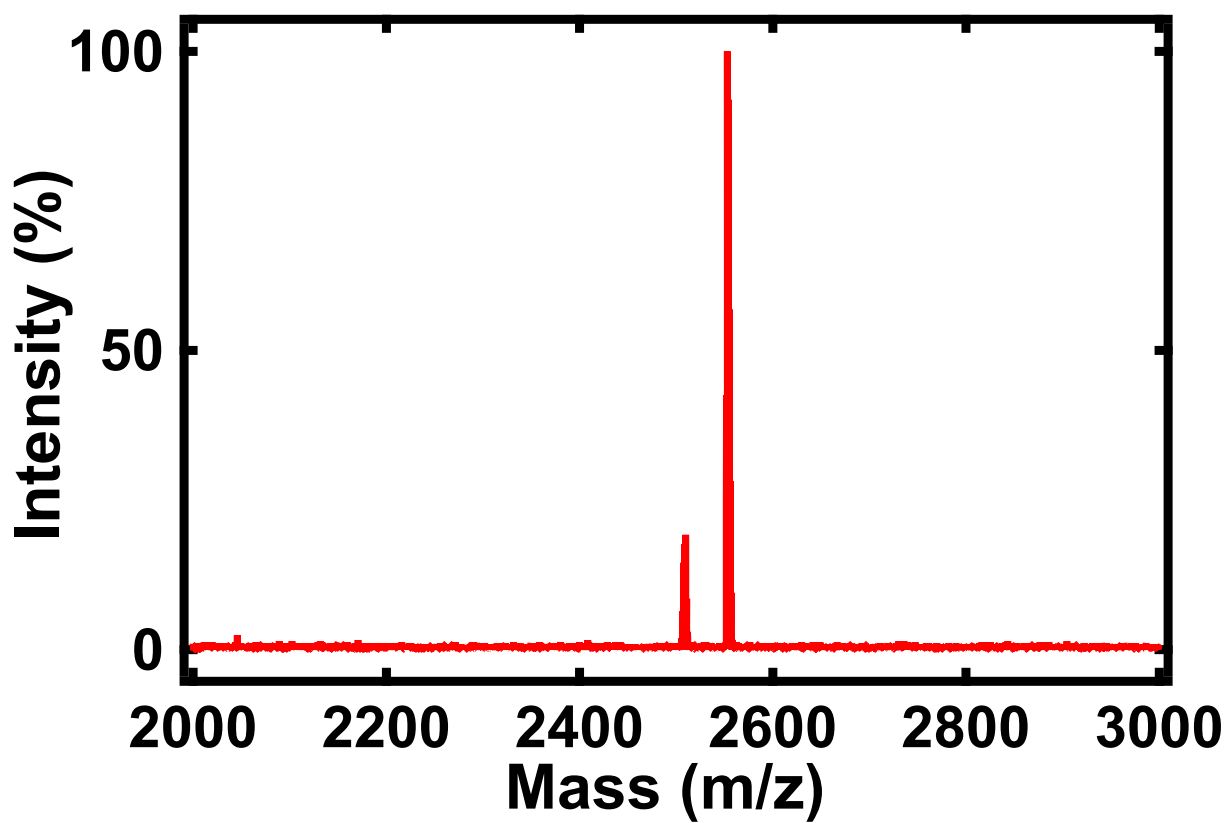

Figure S22. A MALDI mass spectrum obtained for 5a.

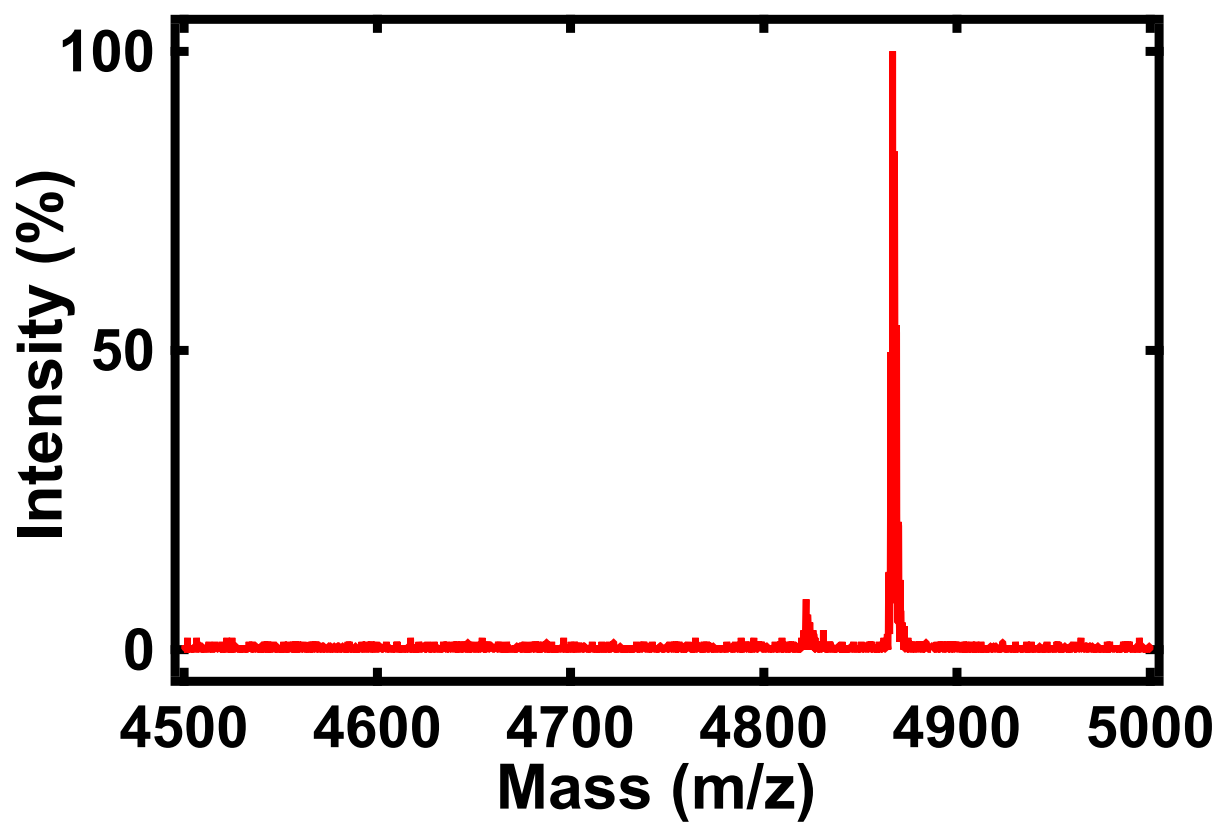

Figure S23. A MALDI mass spectrum obtained for 6a.

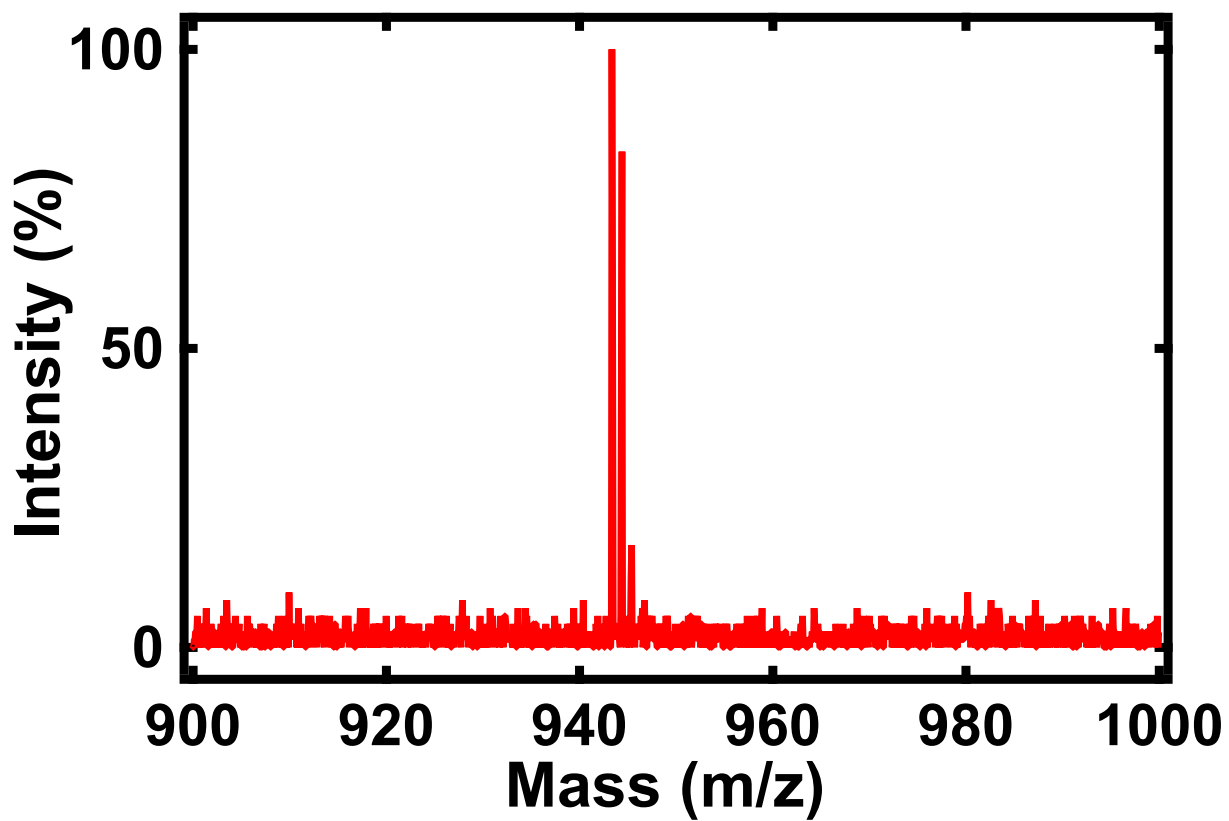

Figure S24. A MALDI mass spectrum obtained for 4b.

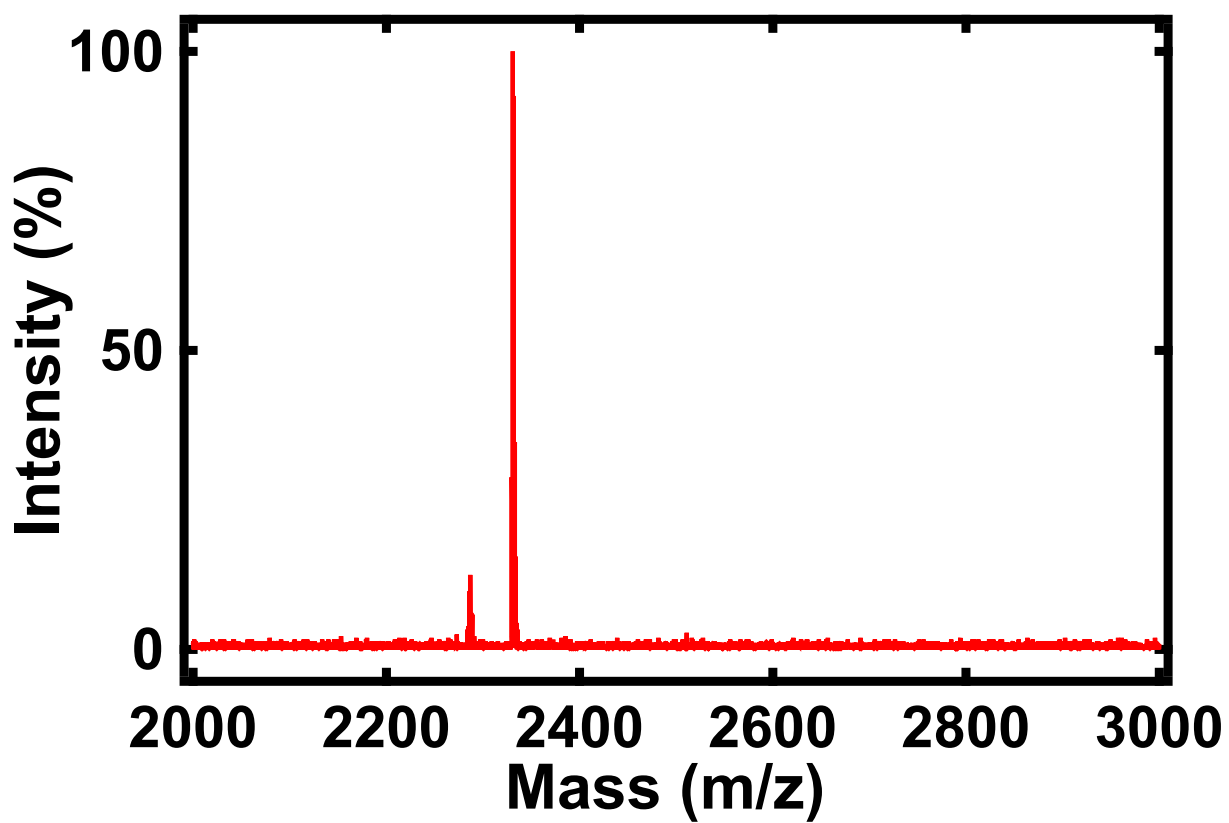

Figure S25. A MALDI mass spectrum obtained for 5b.

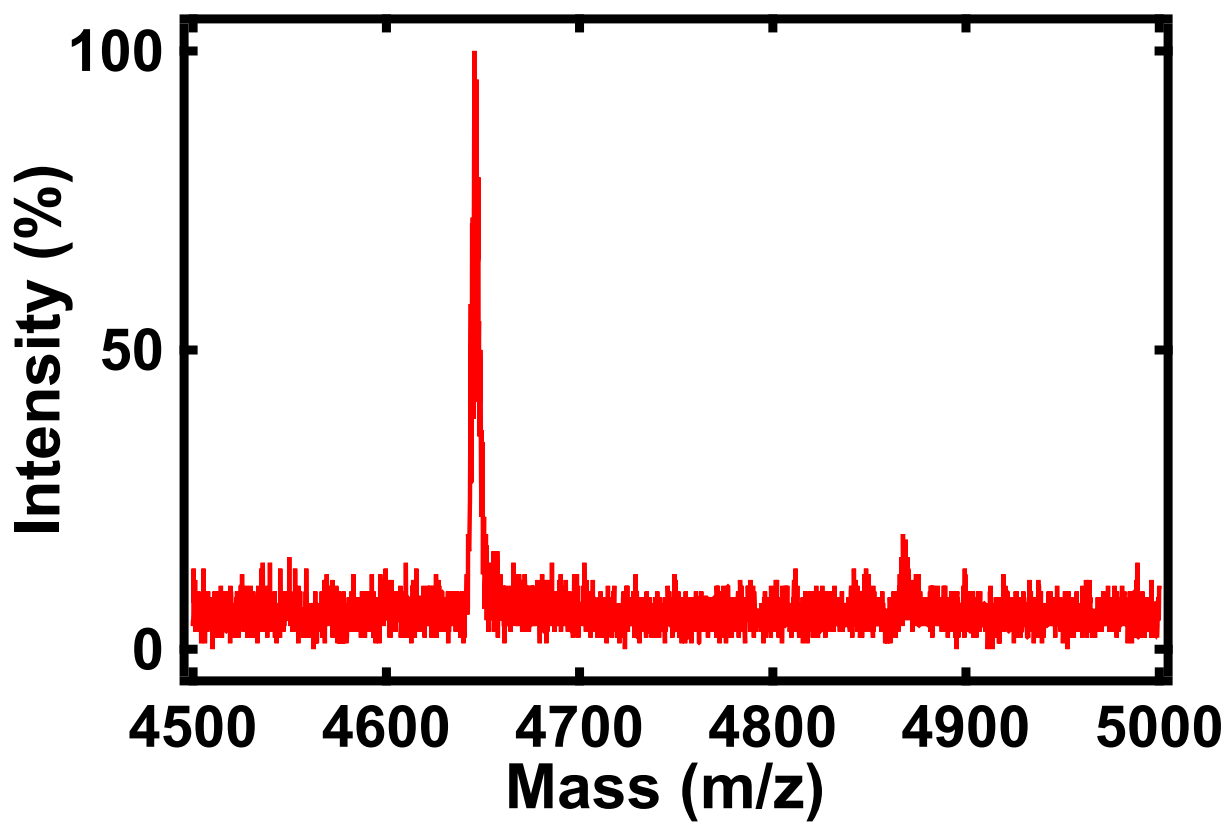

Figure S26. A MALDI mass spectrum obtained for **6b**.

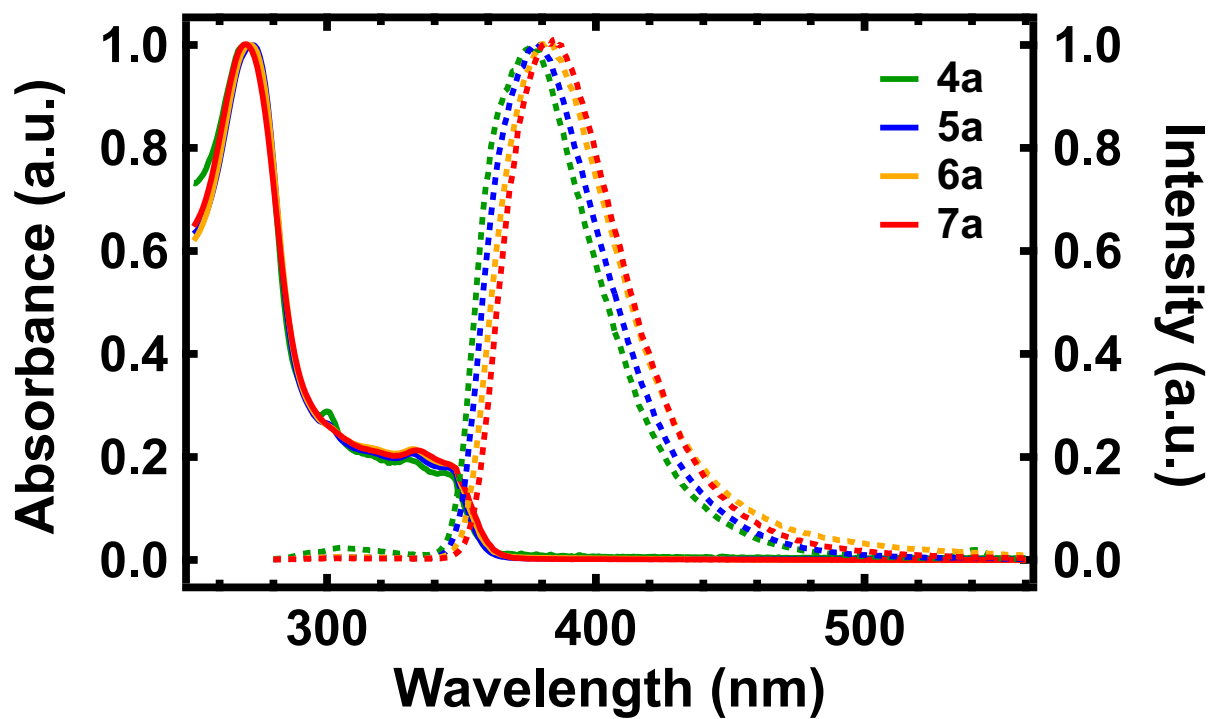

**Figure S27.** The UV-Vis absorption spectra obtained for **4a** (green solid trace), **5a** (blue solid trace), **6a** (orange solid trace), and **7a** (red solid trace), and the fluorescence emission spectra obtained for **4a** (green dashed trace), **5a** (blue dashed trace), **6a** (orange dashed trace), and **7a** (red dashed trace).

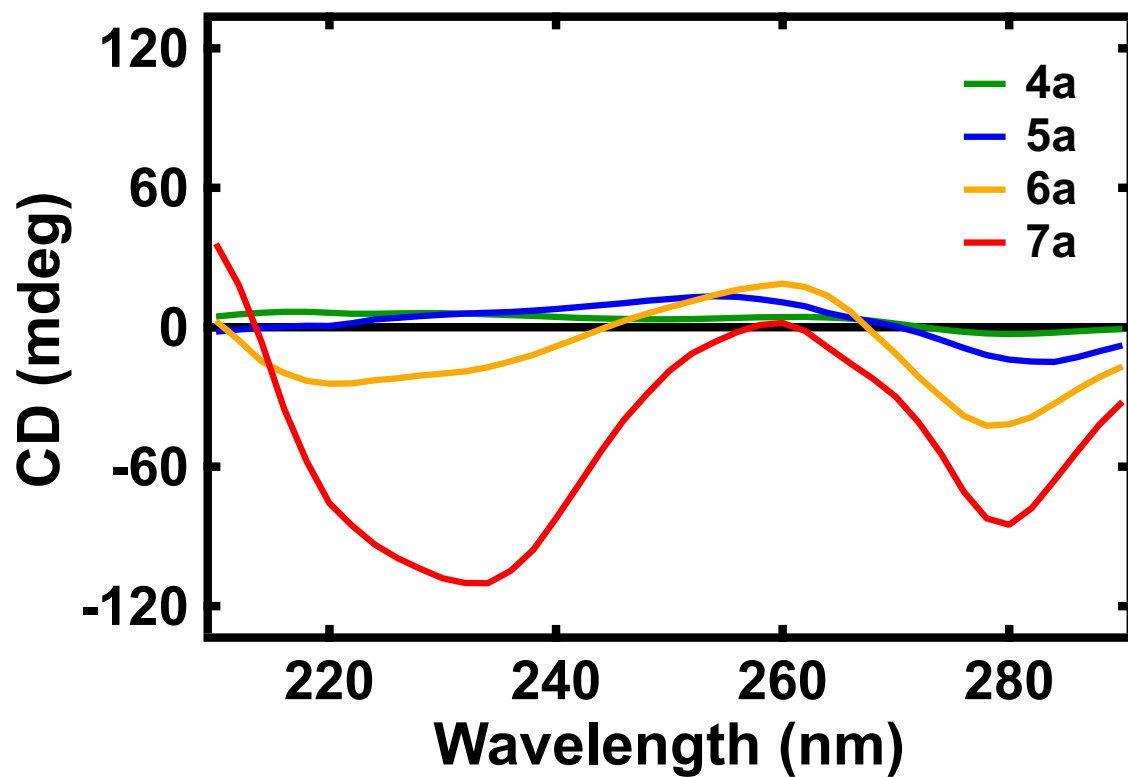

**Figure S28.** The CD spectra obtained for **4a** (green trace), **5a** (blue trace), **6a** (orange trace), and **7a** (red trace).
